# Supplementary material for: Long-term Mortality and Hospital Readmissions Among Survivors of Sepsis in Sweden: A Population-Based Cohort Study
Source: PubMed Central journal article supplement (PMC11221654; doi:10.1093/ofid/ofae331), 2024-06-24
Supplement: ofae331_supplementary_data.pdf [file ofae331_supplementary_data.pdf]

## Supplementary appendix: Long-term mortality and hospital readmissions among sepsis survivors in Sweden

Malin Inghammar, Adam Linder, Maria Lenquist, Attila Frigyesi, Hanna Wetterberg, Jonas Sundén-Cullberg, Anton Nilsson

**Supplementary Table 1: Codes for infectious diseases (ID-codes)**

|                                                                            |                                                                                                                                                                                                                                          |
|----------------------------------------------------------------------------|------------------------------------------------------------------------------------------------------------------------------------------------------------------------------------------------------------------------------------------|
| <b>Codes for infectious as main disease in SIR</b>                         | ICD-10: A00-B99, G00-01, G03.9, G06, I33, I38, I39.8, J01-03, J09-12, J13-16, J18, J22, J86.9, K57, K80.3, K83.0, L03-04, L08.8, L08.9, M00, M01.0, M46.2-3, M46.5, M86.0, N10, N39.0, R57.2, R65.1, T79.3, T81.4, T82.6, T82.7, T85.7). |
|                                                                            |                                                                                                                                                                                                                                          |
| <b>Codes used for outcome definitions:</b>                                 |                                                                                                                                                                                                                                          |
| Enteric infection                                                          | A00-A09                                                                                                                                                                                                                                  |
| Sepsis (bloodstream infections)                                            | A40-A41, R57.2, R65.0-1                                                                                                                                                                                                                  |
| Sexually transmitted infections                                            | A50-A64, B20-B24                                                                                                                                                                                                                         |
| Infections of the neurologic system, including the eye                     | A39, A80-89, B30, G00-02, G03.9, G40.0-2, G04.9, G05-08, G94.0, H00.0, H03, H04.3, H05.0, H06.1, H10.0, H10.2-3, H10.9, H13.0-1, H16.2, H16.8-9, H19.0-2, H22.0, H32.0, H44.0, H45.1                                                     |
| Upper respiratory tract, including the ear                                 | H60.0-3, H60.8-9, H61.0, H62, H66-67, H70, H73.0, H75.0, H83.0, H94.0, J00-06, J34.0, J36, J39.0-1                                                                                                                                       |
| Lower respiratory tract infections, including influenza                    | A15-19, A48.1, J09-22, J44.0-1, J47, J69.0, J85-86                                                                                                                                                                                       |
| Infections of the heart and blood vessels                                  | I30.1, I32.0-1, I33, I38-39, I40.0, I41.0-2, I43.0, I52.0-1, I68.1, I79.0-1, I98.0-1                                                                                                                                                     |
| Infections of the digestive system including the liver (narrow definition) | B15-19, K04.4, K04.6-7, K10.2, K11.3, K12.2, K23.0-1, K61, K63.0, K65.0, K67, K75.0, K77.0, K83.0, K93.0, K93.1                                                                                                                          |
| Infections of the genitourinary system                                     | N08.0, N08.8, N10, N13.6, N15.1, N15.9, N16.0, N29.0-1, N30.0, N30.9, N33.0, N34.0-1, N37, N39.0, N41.0, N41.2-3, N43.1, N45.0, N45.9, N48.1-2, N49, N51, N61, N70-74, N75.1, N76.4, N77.0-1                                             |
| Infections of the skin and soft tissue                                     | A46, L00-03, L05.0, L08, L30.3                                                                                                                                                                                                           |
| Infections of bone, joints and connective tissue                           | M00-01, M46.2-5, M49.0-2, M60.0, M63.0-2, M65.0, M68.0, M71.0-1, M72.5-6, M73.0-1, M86, M90.0-2                                                                                                                                          |
| Infectious complications                                                   | T79.3, T80.2, T81.4, T82.6-7, T83.5-6, T84.5-7, T85.7, T87.4, T88.0                                                                                                                                                                      |
| Other infections                                                           | A20-28, A30-38, A42-49, A65-69, A70-79, A92-99, B00-09, B25-27, B33-99, D70.9, D73.3, E06.0, E32.1                                                                                                                                       |

Classification according to: Gustav T *et al.* Hospitalisations with infectious disease diagnoses in somatic healthcare between 1998 and 2019: A nationwide, register-based study in Swedish adults. *Lancet Reg Health Eur.* 2022;16:100343

**Supplementary Table 2: Diagnoses, procedures, and pharmaceuticals adjusted for**

|                                                                                                                                                                                                                | <i>ICD-10-SE<sup>1</sup>, ATC<sup>2</sup>, or procedure<sup>3</sup> code</i>                                                                                                                 |
|----------------------------------------------------------------------------------------------------------------------------------------------------------------------------------------------------------------|----------------------------------------------------------------------------------------------------------------------------------------------------------------------------------------------|
| <ul style="list-style-type: none"> <li>• <b>Medical history &lt; 5 years of index</b></li> <li>• <b>Main and additional discharge diagnoses</b></li> <li>• <b>Inpatient and Outpatient Registry</b></li> </ul> | <b>ICD-10 codes unless otherwise specified</b>                                                                                                                                               |
| Enteric infection                                                                                                                                                                                              | A00-A09                                                                                                                                                                                      |
| Sepsis (bloodstream infections)                                                                                                                                                                                | A40-A41, R57.2, R65.0-1                                                                                                                                                                      |
| Sexually transmitted infections                                                                                                                                                                                | A50-A64, B20-B24                                                                                                                                                                             |
| Infections of the neurological system, including the eye                                                                                                                                                       | A39, A80-89, B30, G00-02, G03.9, G40.0-2, G04.9, G05-08, G94.0, H00.0, H03, H04.3, H05.0, H06.1, H10.0, H10.2-3, H10.9, H13.0-1, H16.2, H16.8-9, H19.0-2, H22.0, H32.0, H44.0, H45.1         |
| Upper respiratory tract, including the ear                                                                                                                                                                     | H60.0-3, H60.8-9, H61.0, H62, H66-67, H70, H73.0, H75.0, H83.0, H94.0, J00-06, J34.0, J36, J39.0-1                                                                                           |
| Lower respiratory tract infections, including influenza                                                                                                                                                        | A15-19, A48.1, J09-22, J44.0-1, J47, J69.0, J85-86                                                                                                                                           |
| Infections of the heart and blood vessels                                                                                                                                                                      | I30.1, I32.0-1, I33, I38-39, I40.0, I41.0-2, I43.0, I52.0-1, I68.1, I79.0-1, I98.0-1                                                                                                         |
| Infections of the digestive system including the liver (narrow definition)                                                                                                                                     | B15-19, K04.4, K04.6-7, K10.2, K11.3, K12.2, K23.0-1, K61, K63.0, K65.0, K67, K75.0, K77.0, K83.0, K93.0, K93.1                                                                              |
| Infections of the genitourinary system                                                                                                                                                                         | N08.0, N08.8, N10, N13.6, N15.1, N15.9, N16.0, N29.0-1, N30.0, N30.9, N33.0, N34.0-1, N37, N39.0, N41.0, N41.2-3, N43.1, N45.0, N45.9, N48.1-2, N49, N51, N61, N70-74, N75.1, N76.4, N77.0-1 |
| Infections of the skin and soft tissue                                                                                                                                                                         | A46, L00-03, L05.0, L08, L30.3                                                                                                                                                               |
| Infections of bone, joints and connective tissue                                                                                                                                                               | M00-01, M46.2-5, M49.0-2, M60.0, M63.0-2, M65.0, M68.0, M71.0-1, M72.5-6, M73.0-1, M86, M90.0-2                                                                                              |
| Other infections                                                                                                                                                                                               | A20-28, A30-38, A42-49, A65-69, A70-79, A92-99, B00-09, B25-27, B33-99, D70.9, D73.3, E06.0, E32.1                                                                                           |
| Acute coronary syndrome (MI)                                                                                                                                                                                   | I20.0, I21-22, I23                                                                                                                                                                           |
| Other ischemic heart disease                                                                                                                                                                                   | I20.1-9, I24-25                                                                                                                                                                              |
| Heart failure                                                                                                                                                                                                  | I11.0, I13.0, I13.2, I42.0-5, I42.7-9, I43, I50, I51.7, J81, K76.1                                                                                                                           |
| Valve disorders                                                                                                                                                                                                | I05-I09, I34-37,                                                                                                                                                                             |
| Other heart disease, hypertonia, cardiac surgery                                                                                                                                                               | I10, I11.9, I12.9, I13.9, I15, I27.1, I27.9, I30.0, I30.8-9, I51.0-6, I51.8-9                                                                                                                |
| Vascular disease                                                                                                                                                                                               | I65, I70-72, I73.1, I73.8-9, I74, I77.1, I77.6, I79.0, I79.2, K55, I87.2, I89.0, I97.2, R02, Z95.1-9                                                                                         |
| Cerebrovascular disease                                                                                                                                                                                        | G45-46, I60-64, I67, I69                                                                                                                                                                     |
| Tromboembolic disease                                                                                                                                                                                          | I26, I82                                                                                                                                                                                     |
| Arrhythmia                                                                                                                                                                                                     | I44-49 (not I46.1), R00, Z45.0, Z95.0, T82.1                                                                                                                                                 |
| Pulmonary disease                                                                                                                                                                                              | E84, I27.0, I27.2-9, I28.0, I28.8-9, J41-47, J60-J67, J68.4, J70.1, J70.3, J80, J84, J92, J95, J96, J98.2, R09.2, Z99.2                                                                      |

|                                           |                                                                                                                                                                                                                        |
|-------------------------------------------|------------------------------------------------------------------------------------------------------------------------------------------------------------------------------------------------------------------------|
| Rheumatic disease                         | I00-02, J99.0-1, M05-09, M12.3, M13, M30, M31.1, M31.3-9, M32-34, M35.0-3, M35.8-9, M45-46, D86                                                                                                                        |
| Dementia                                  | F00-03, F05.1, G30, G31.1, G31.8-9, G32                                                                                                                                                                                |
| Hemiplegia, tetraplegia                   | G11.4, G80-82, G83.0-3, G83.8                                                                                                                                                                                          |
| Neurologic disease                        | G10-14, G20-21, G23, G35-37, G60-62, G70-71, G91, G93.1                                                                                                                                                                |
| Schizophrenia, bipolar disorder           | F20-31                                                                                                                                                                                                                 |
| Other psychiatric disease                 | F04, F05.0, F05.8-9, F06-07, F09, F33-39, F44.9,                                                                                                                                                                       |
| Drug or alcohol abuse, incl. intoxication | F10-19, K29.2, K70.0-1, G31.2, G62.1, G72.1, I42.6, R78.1-5, T40, T51, Z71.4-5                                                                                                                                         |
| Diabetes                                  | E10-14, I79.2                                                                                                                                                                                                          |
| Kidney disease                            | N00-01, N03-07, N11-12, N17-19, N25.0, N26-27, N28.0, I12.0, I13.1, Q61.1-4, Z49, Z99.2,<br><i>Procedure codes: DR016, DR024</i>                                                                                       |
| Liver disease                             | K70.2-4, K70.9, K71.1, K71.3-5, K71.7, K72-74, K75.2-9, K76.0, K76.2-9, R18, I81, I85, I86.4, I98.2, I98.8                                                                                                             |
| Gastro-intestinal disease                 | K50-52                                                                                                                                                                                                                 |
| Cancer, neoplasms                         | C00-D48, J70.0, T45.1, Z51.0, Z51.1 ( <i>not included: Z85</i> )                                                                                                                                                       |
| HIV/AIDS                                  | B20-24, F02.4, O98.7, R75, Z11.4, Z21.9, Z71.1                                                                                                                                                                         |
| Immune deficiency, blood disease, anemia  | D50.1-9, D51-53, D60-61, D64.9, D65-68, D69.1, D69.3-6, D70-72, D73.0-2, D73.5-9, D76, D80-84, D89                                                                                                                     |
| Other conditions                          | G96.0, E22.2, E40-44, E46, E64, E66, E86, E87, R40.2, R64, R63.4                                                                                                                                                       |
|                                           |                                                                                                                                                                                                                        |
|                                           | <ul style="list-style-type: none"> <li>• <b>Medical history at any time &lt; 5 &gt; years</b></li> <li>• <b>Main and additional discharge diagnoses</b></li> <li>• <b>Inpatient and Outpatient Registry</b></li> </ul> |
| Any medical history                       |                                                                                                                                                                                                                        |
| Cardiac surgery                           | <i>Procedure codes: F(A-X), I97.0-1,</i>                                                                                                                                                                               |
| Organ transplantation                     | Z94, T86, <i>Procedure codes: KAS, FQA, FQB, JJC, GDG, JLE</i>                                                                                                                                                         |
| Childhood conditions                      | F71.1, F72-73, F79.1, F83, F84, G80, Q01-03, Q05, Q20-26, Q90                                                                                                                                                          |
|                                           |                                                                                                                                                                                                                        |
|                                           | <ul style="list-style-type: none"> <li>• <b>ATC-codes &lt; 1 year</b></li> <li>• <b>Drug prescription Registry</b></li> </ul>                                                                                          |
| Cardiac disease                           | C09A-D, CCB, C08C, C08D, C03C, C03EB, C03A, C03B, C03D, C03EA, C07, C01B, C01AA05, C01DA, B01AC, B01AA, C10                                                                                                            |
| Lung disease                              | R03AC, R03BB, R03BA, R03AK, R03DA                                                                                                                                                                                      |
| Diabetes                                  | A10B A10A                                                                                                                                                                                                              |
| Rheumatic disease                         | M01A                                                                                                                                                                                                                   |
| Psychiatric disease                       | N05A, N05B, N05C, N06A, N06D, N07BB, N07BC                                                                                                                                                                             |
| Immune suppressive drugs                  | H02AB, L01B, L04A, L01                                                                                                                                                                                                 |
|                                           | <ul style="list-style-type: none"> <li>• <b>Health care use</b></li> </ul>                                                                                                                                             |

|                                                                       |  |
|-----------------------------------------------------------------------|--|
| No of hospitalizations in last 5 years                                |  |
| No of days in hospital in last 5 years                                |  |
| No of (all codes) hospitalizations in last year                       |  |
| No of (all codes) outpatient visits in last year                      |  |
| No of drug used in last year                                          |  |
| No of days of hospitalization for infectious diseases in last 5 years |  |
| No of hospitalizations for infectious diseases in last 5 years        |  |
| No of hospitalizations in last 6 months                               |  |

1) <https://www.socialstyrelsen.se/statistik-och-data/klassifikationer-och-koder/icd-10/>

2) [https://www.whocc.no/atc\\_ddd\\_index/](https://www.whocc.no/atc_ddd_index/)

3) <https://www.socialstyrelsen.se/statistik-och-data/klassifikationer-och-koder/kva/>

### Supplementary Table 3: All-cause mortality

| Period      | n at risk |         | Mortality % |         | aHR (95% CI)     |
|-------------|-----------|---------|-------------|---------|------------------|
|             | Case      | Control | Case        | Control |                  |
| First month | 20,313    | 396,967 | 27          | 0.5     | 58.1 (47.6-70.9) |
| Month 2-12  | 14,682    | 392,104 | 16          | 6.4     | 3.0 (2.8-3.2)    |
| Year 1-3    | 11,089    | 345,525 | 16          | 11      | 1.8 (1.7-1.9)    |
| Year 3-5    | 7,040     | 250,569 | 14          | 9.4     | 1.9 (1.7-2.0)    |
| Year 5+     | 4,268     | 168,764 | 19          | 15      | 1.6 (1.5-1.8)    |

### Supplementary Figure 1:

Adjusted HRs for all-cause and cause-specific long-term mortality estimated by Cox regression in critically ill sepsis patients treated in ICU 2008-2019, compared to weighted controls from the background population, for different time periods of follow up.

The category of infectious diseases was expanded to also include a number of codes that relate to infectious disease but belong to other chapters. Abbreviations: CI, confidence interval; HR hazard ratio.

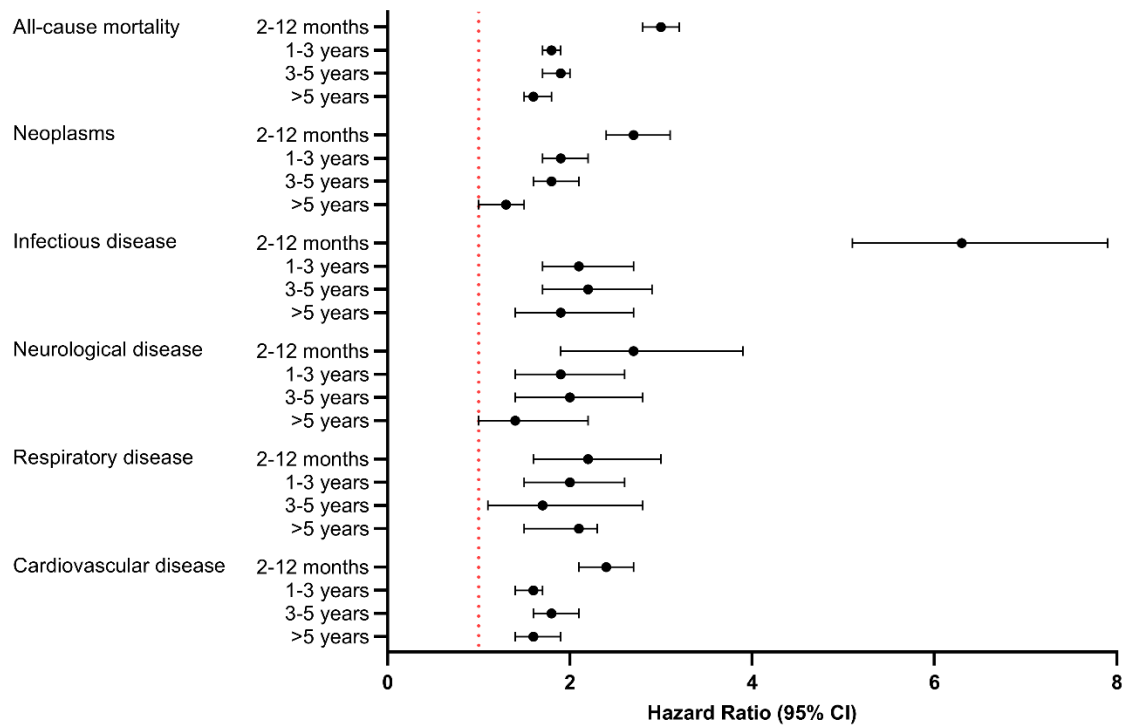

**Supplementary figure 2: Kaplan-Meier graph of all-cause mortality**

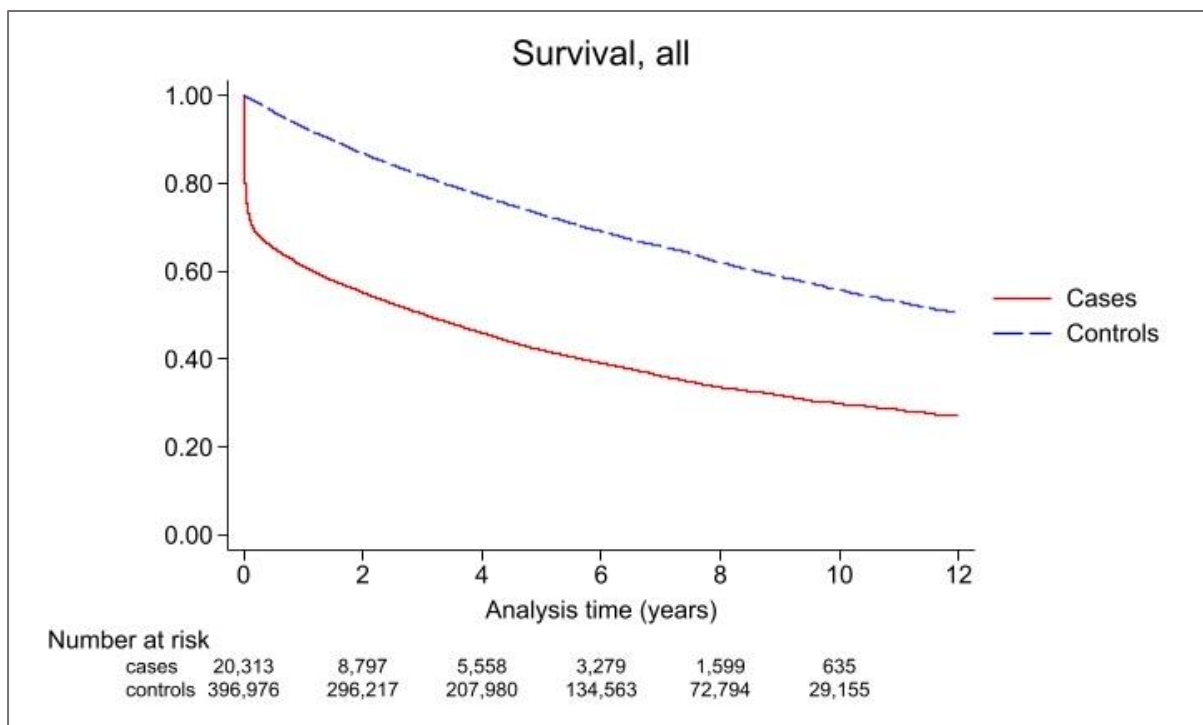

### Supplementary figure 3: Kaplan-Meier graphs of all-cause mortality according to subgroups

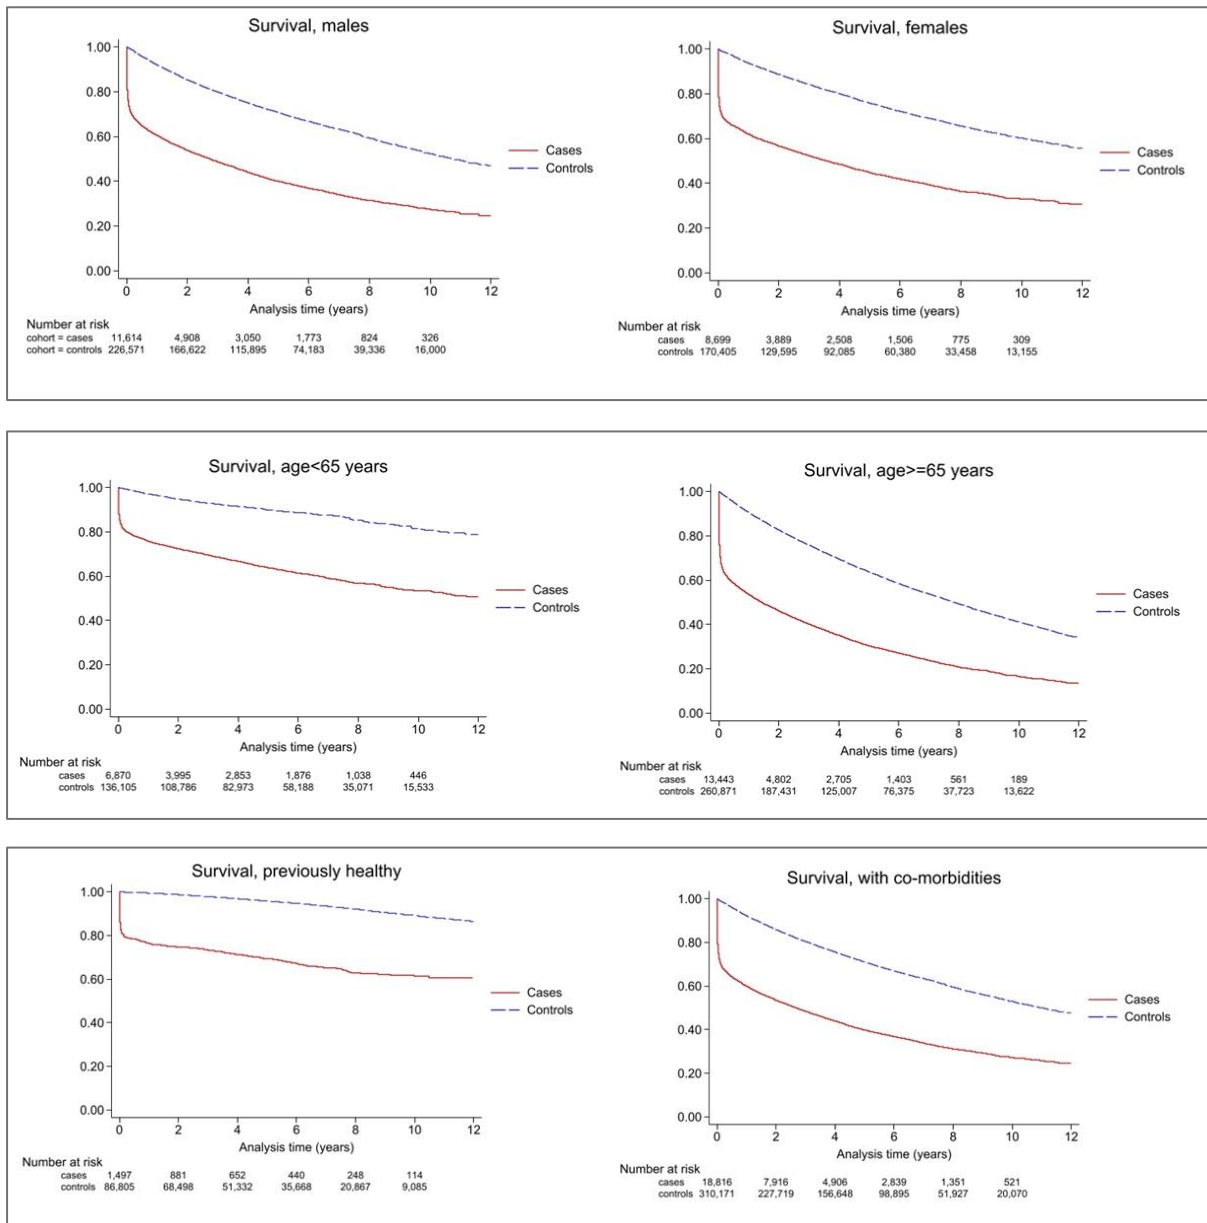

### Supplementary Figure 4:

Adjusted HRs for all-cause and cause-specific re-hospitalization estimated by recurrent event Cox regression in critically ill sepsis patients treated in ICU 2008-2019, compared to weighted controls from the background population, for different time periods of follow up.

The category of infectious diseases was expanded to also include a number of codes that relate to infectious disease but belong to other chapters. Abbreviations: CI, confidence interval; HR hazard ratio.

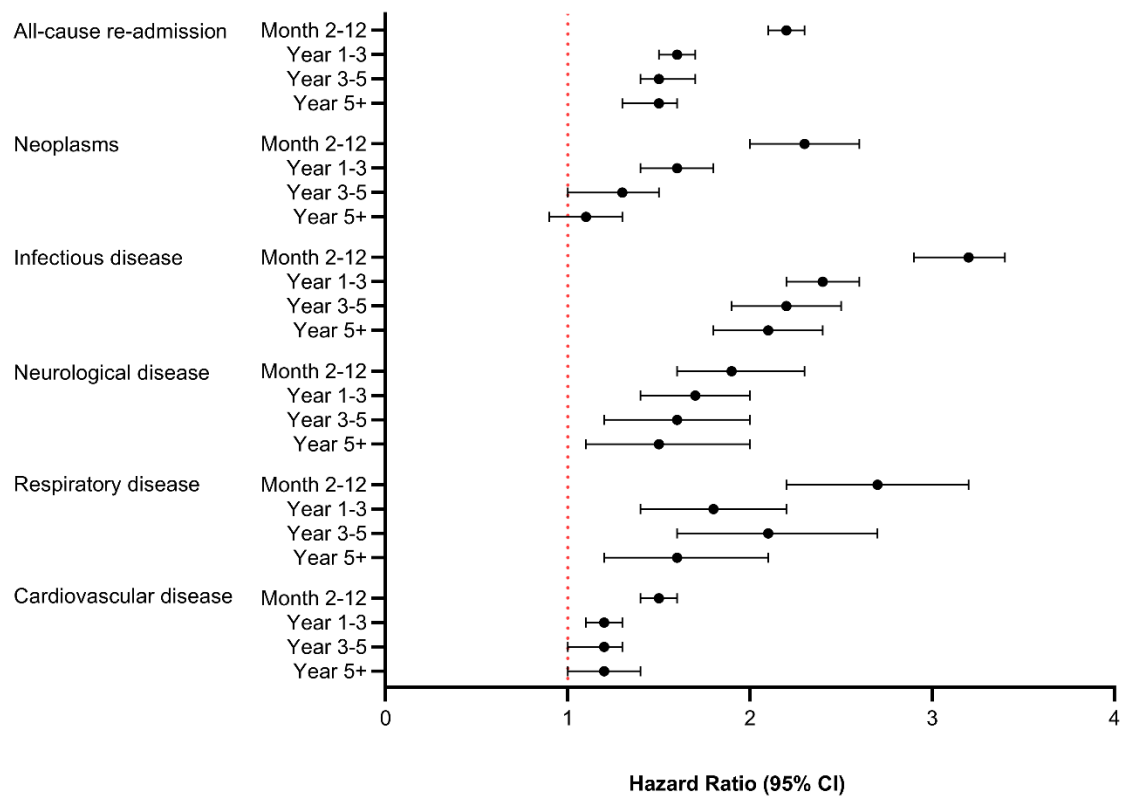

**Supplementary Table 4: Subgroup-specific aHRs for rehospitalizations compared to weighted controls, estimated by recurrent-event Cox regression, for different time periods of follow up.**

| Rehospitalization according to subgroups | First month aHR (95% CI) | Month 2-12 aHR (95% CI) | Year 1-3 aHR (95% CI) | Year 3-5 aHR (95% CI) | Year 5+ aHR (95% CI) |
|------------------------------------------|--------------------------|-------------------------|-----------------------|-----------------------|----------------------|
| Female                                   | 1.9 (1.7-2.2)            | 2.3 (2.2-2.5)           | 1.6 (1.5-1.8)         | 1.6 (1.5-1.8)         | 1.5 (1.3-1.7)        |
| Male                                     | 1.9 (1.7-2.1)            | 2.1 (2.0-2.3)           | 1.6 (1.5-1.8)         | 1.5 (1.3-1.7)         | 1.5 (1.3-1.7)        |
|                                          |                          |                         |                       |                       |                      |
| Age <65                                  | 2.3 (1.8-2.9)            | 2.5 (2.2-2.8)           | 1.8 (1.5-2.1)         | 1.7 (1.4-2.1)         | 1.7 (1.4-2.0)        |
| Age >65                                  | 1.8 (1.6-1.9)            | 2.1 (2.0-2.2)           | 1.5 (1.4-1.6)         | 1.4 (1.3-1.5)         | 1.3 (1.2-1.4)        |
|                                          |                          |                         |                       |                       |                      |
| Previously healthy                       | 15.8 (12.5-20.0)         | 9.0 (7.9-10.1)          | 3.5 (2.9-4.1)         | 3.1 (2.6-3.7)         | 2.5 (2.0-3.0)        |
| Underlying co-morbidities                | 1.8 (1.7-2.0)            | 2.2 (2.0-2.3)           | 1.6 (1.5-1.7)         | 1.5 (1.4-1.6)         | 1.4 (1.3-1.6)        |
|                                          |                          |                         |                       |                       |                      |
| SAPS3 Lowest (<60)                       | 2.3 (1.9-2.8)            | 2.2 (2.0-2.4)           | 1.6 (1.4-1.8)         | 1.4 (1.2-1.6)         | 1.4 (1.2-1.7)        |
| SAPS3 Middle (61-72)                     | 1.9 (1.7-2.2)            | 2.2 (2.0-2.3)           | 1.6 (1.5-1.8)         | 1.6 (1.5-1.8)         | 1.6 (1.4-1.8)        |
| SAPS3 Highest (>72)                      | 1.3 (1.1-1.5)            | 2.3 (2.2-2.5)           | 1.7 (1.6-1.9)         | 1.7 (1.5-1.9)         | 1.3 (1.1-1.5)        |

**Supplementary Table 5:** Unadjusted and adjusted (with outpatient visits during the past 1-30 days added to the comorbidity adjustments) HRs for all-cause mortality and rehospitalizations compared to weighted controls, estimated by Cox regression, for different time periods of follow up.

|                                                                | First month aHR (95% CI) | Month 2-12 aHR (95% CI) | Year 1-3 aHR (95% CI) | Year 3-5 aHR (95% CI) | Year 5+ aHR (95% CI) |
|----------------------------------------------------------------|--------------------------|-------------------------|-----------------------|-----------------------|----------------------|
| <b>Crude-unadjusted analyses</b>                               |                          |                         |                       |                       |                      |
| All-cause mortality                                            | 183.2 (168.2-199.5)      | 7.4 (7.1-7.8)           | 3.2 (3.0-3.4)         | 2.6 (2.5-2.8)         | 1.9 (1.7-2.0)        |
| All-cause rehospitalization                                    | 5.7 (5.4-6.1)            | 5.6 (5.5-5.8)           | 3.6 (3.5-3.7)         | 3.0 (2.8-3.1)         | 2.4 (2.3-2.5)        |
| <b>Fully adjusted (incl. outpatient visits past 1-30 days)</b> |                          |                         |                       |                       |                      |
| All-cause mortality                                            | 58.9 (48.4-71.7)         | 3.0 (2.7-3.2)           | 1.8 (1.7-1.9)         | 1.9 (1.7-2.0)         | 1.6 (1.5-1.8)        |
| All-cause rehospitalization                                    | 1.8 (1.7-2.0)            | 2.2 (2.1-2.3)           | 1.6 (1.5-1.7)         | 1.5 (1.3-1.6)         | 1.5 (1.3-1.6)        |

**Supplementary Table 6:** Adjusted HRs for all-cause mortality and rehospitalizations compared to weighted controls, estimated by Cox regression, for different time periods of follow up, according to registration in National Quality Register for Sepsis (NQSR).

|                                    | First month aHR (95% CI) | Month 2-12 aHR (95% CI) | Year 1-3 aHR (95% CI) | Year 3-5 aHR (95% CI) | Year 5+ aHR (95% CI) |
|------------------------------------|--------------------------|-------------------------|-----------------------|-----------------------|----------------------|
| <b>All-cause mortality</b>         |                          |                         |                       |                       |                      |
| Registered in NQSR                 | 46.2 (23.8-89.6)         | 2.7 (2.2-3.3)           | 1.8 (1.5-2.1)         | 1.9 (1.5-2.3)         | 1.5 (1.1-2.0)        |
| Registered in SIR only             | 61.4 (51.2-73.5)         | 3.1 (2.9-3.3)           | 1.8 (1.7-1.9)         | 1.8 (1.7-2.0)         | 1.6 (1.5-1.8)        |
| <b>All-cause rehospitalization</b> |                          |                         |                       |                       |                      |
| Registered in NQSR                 | 2.1 (1.7-2.6)            | 2.0 (1.7-2.3)           | 1.6 (1.4-1.9)         | 1.5 (1.2-1.9)         | 1.4 (1.1-1.7)        |
| Registered in SIR only             | 1.9 (1.7-2.0)            | 2.2 (2.1-2.4)           | 1.6 (1.5-1.8)         | 1.5 (1.4-1.7)         | 1.5 (1.3-1.6)        |

**Supplementary Table 7:** Adjusted HRs for all-cause mortality according to site of infection, compared to weighted controls, estimated by Cox regression, for different time periods of follow up, for sepsis cases registered in the National Quality Register for Sepsis (NQSR).

| All-cause mortality according to site of infection | First month aHR (95% CI) | Month 2-12 aHR (95% CI) | Year 1-3 aHR (95% CI) | Year 3-5 aHR (95% CI) | Year 5+ aHR (95% CI) |
|----------------------------------------------------|--------------------------|-------------------------|-----------------------|-----------------------|----------------------|
| Pneumonia                                          | 87.7 (41.3-186.0)        | 2.4 (1.7-3.5)           | 1.6 (1.1-2.4)         | 1.8 (1.2-2.6)         | 1.9 (1.2-3.1)        |
| Urinary tract infection                            | 16.8 (5.4-52.7)          | 2.2 (1.6-3.2)           | 1.8 (1.3-2.5)         | 1.3 (0.8-2.0)         | 1.2 (0.6-2.3)        |
| Other sites of infection                           | 57.8 (22.2-150.2)        | 3.8 (2.7-5.4)           | 1.9 (1.4-2.6)         | 1.9 (1.2-3.0)         | 2.0 (1.2-3.3)        |
| Missing information                                | 52.4 (15.5-177.4)        | 4.8 (2.2-10.5)          | 2.5 (1.4-4.4)         | 2.0 (0.9-4.7)         | -                    |
